# Supplementary material
Source: publisher site journal article supplement (https://www.dovepress.com/article/456965)
Supplement: Supplementary file 1 [file get_supplementary_file.php]

Additional file Table.S1. Significant gene ontology terms for CENPQ-expressed differential genes (Biological Processes).

| Ontology | ID | Description |
| --- | --- | --- |
| BP | GO:0048285 | organelle fission |
| BP | GO:0000280 | nuclear division |
| BP | GO:0007059 | chromosome segregation |
| BP | GO:0098813 | nuclear chromosome segregation |
| BP | GO:0007346 | regulation of mitotic cell cycle |
| BP | GO:0140014 | mitotic nuclear division |
| BP | GO:0010817 | regulation of hormone levels |
| BP | GO:0048568 | embryonic organ development |
| BP | GO:0007389 | pattern specification process |
| BP | GO:0042391 | regulation of membrane potential |
| BP | GO:0044772 | mitotic cell cycle phase transition |
| BP | GO:0023061 | signal release |
| BP | GO:0051321 | meiotic cell cycle |
| BP | GO:0009410 | response to xenobiotic stimulus |
| BP | GO:1901987 | regulation of cell cycle phase transition |
| BP | GO:0022412 | cellular process involved in reproduction in multicellular organism |
| BP | GO:0003002 | regionalization |
| BP | GO:0000819 | sister chromatid segregation |
| BP | GO:1901990 | regulation of mitotic cell cycle phase transition |
| BP | GO:0001655 | urogenital system development |
| BP | GO:0048562 | embryonic organ morphogenesis |
| BP | GO:0000070 | mitotic sister chromatid segregation |
| BP | GO:0140013 | meiotic nuclear division |
| BP | GO:1903046 | meiotic cell cycle process |
| BP | GO:0010038 | response to metal ion |
| BP | GO:0006887 | exocytosis |
| BP | GO:0010948 | negative regulation of cell cycle process |
| BP | GO:0072001 | renal system development |
| BP | GO:0006310 | DNA recombination |
| BP | GO:0006260 | DNA replication |
| BP | GO:0001822 | kidney development |
| BP | GO:0006959 | humoral immune response |
| BP | GO:0043583 | ear development |
| BP | GO:0009636 | response to toxic substance |
| BP | GO:0090596 | sensory organ morphogenesis |
| BP | GO:0098742 | cell-cell adhesion via plasma-membrane adhesion molecules |
| BP | GO:1901988 | negative regulation of cell cycle phase transition |
| BP | GO:0046879 | hormone secretion |
| BP | GO:0007411 | axon guidance |
| BP | GO:0097485 | neuron projection guidance |
| BP | GO:0090068 | positive regulation of cell cycle process |
| BP | GO:0045165 | cell fate commitment |
| BP | GO:0006302 | double-strand break repair |
| BP | GO:0048839 | inner ear development |
| BP | GO:0051783 | regulation of nuclear division |
| BP | GO:0000075 | cell cycle checkpoint signaling |
| BP | GO:0046883 | regulation of hormone secretion |
| BP | GO:0045930 | negative regulation of mitotic cell cycle |
| BP | GO:0007088 | regulation of mitotic nuclear division |
| BP | GO:0007127 | meiosis I |
| BP | GO:0061982 | meiosis I cell cycle process |
| BP | GO:1902850 | microtubule cytoskeleton organization involved in mitosis |
| BP | GO:0007051 | spindle organization |
| BP | GO:0071241 | cellular response to inorganic substance |
| BP | GO:0015698 | inorganic anion transport |
| BP | GO:1901991 | negative regulation of mitotic cell cycle phase transition |
| BP | GO:0051302 | regulation of cell division |
| BP | GO:0033044 | regulation of chromosome organization |
| BP | GO:0045132 | meiotic chromosome segregation |
| BP | GO:0007093 | mitotic cell cycle checkpoint signaling |
| BP | GO:0006261 | DNA-templated DNA replication |
| BP | GO:0044839 | cell cycle G2/M phase transition |
| BP | GO:0071466 | cellular response to xenobiotic stimulus |
| BP | GO:0071248 | cellular response to metal ion |
| BP | GO:0051304 | chromosome separation |
| BP | GO:0007218 | neuropeptide signaling pathway |
| BP | GO:0007052 | mitotic spindle organization |
| BP | GO:0098754 | detoxification |
| BP | GO:0000725 | recombinational repair |
| BP | GO:0048736 | appendage development |
| BP | GO:0060173 | limb development |
| BP | GO:0051983 | regulation of chromosome segregation |
| BP | GO:0042471 | ear morphogenesis |
| BP | GO:0000086 | G2/M transition of mitotic cell cycle |
| BP | GO:0000724 | double-strand break repair via homologous recombination |
| BP | GO:0007156 | homophilic cell adhesion via plasma membrane adhesion molecules |
| BP | GO:0021953 | central nervous system neuron differentiation |
| BP | GO:0006821 | chloride transport |
| BP | GO:0007586 | digestion |
| BP | GO:0042472 | inner ear morphogenesis |
| BP | GO:0060078 | regulation of postsynaptic membrane potential |
| BP | GO:0035107 | appendage morphogenesis |
| BP | GO:0035108 | limb morphogenesis |
| BP | GO:0033045 | regulation of sister chromatid segregation |
| BP | GO:1902749 | regulation of cell cycle G2/M phase transition |
| BP | GO:0031570 | DNA integrity checkpoint signaling |
| BP | GO:0030071 | regulation of mitotic metaphase/anaphase transition |
| BP | GO:0007091 | metaphase/anaphase transition of mitotic cell cycle |
| BP | GO:1902099 | regulation of metaphase/anaphase transition of cell cycle |
| BP | GO:0010965 | regulation of mitotic sister chromatid separation |
| BP | GO:0044784 | metaphase/anaphase transition of cell cycle |
| BP | GO:0051306 | mitotic sister chromatid separation |
| BP | GO:0070192 | chromosome organization involved in meiotic cell cycle |
| BP | GO:1905818 | regulation of chromosome separation |
| BP | GO:0010389 | regulation of G2/M transition of mitotic cell cycle |
| BP | GO:0006805 | xenobiotic metabolic process |
| BP | GO:0051225 | spindle assembly |
| BP | GO:0051784 | negative regulation of nuclear division |
| BP | GO:2001251 | negative regulation of chromosome organization |
| BP | GO:0030326 | embryonic limb morphogenesis |
| BP | GO:0035113 | embryonic appendage morphogenesis |
| BP | GO:0045143 | homologous chromosome segregation |
| BP | GO:0001708 | cell fate specification |
| BP | GO:0045839 | negative regulation of mitotic nuclear division |
| BP | GO:0051303 | establishment of chromosome localization |
| BP | GO:0050000 | chromosome localization |
| BP | GO:0044774 | mitotic DNA integrity checkpoint signaling |
| BP | GO:0098661 | inorganic anion transmembrane transport |
| BP | GO:0061640 | cytoskeleton-dependent cytokinesis |
| BP | GO:0048663 | neuron fate commitment |
| BP | GO:1902476 | chloride transmembrane transport |
| BP | GO:0021536 | diencephalon development |
| BP | GO:0061844 | antimicrobial humoral immune response mediated by antimicrobial peptide |
| BP | GO:0051781 | positive regulation of cell division |
| BP | GO:0032508 | DNA duplex unwinding |
| BP | GO:0045841 | negative regulation of mitotic metaphase/anaphase transition |
| BP | GO:1902100 | negative regulation of metaphase/anaphase transition of cell cycle |
| BP | GO:0033046 | negative regulation of sister chromatid segregation |
| BP | GO:0033048 | negative regulation of mitotic sister chromatid segregation |
| BP | GO:2000816 | negative regulation of mitotic sister chromatid separation |
| BP | GO:0051985 | negative regulation of chromosome segregation |
| BP | GO:1905819 | negative regulation of chromosome separation |
| BP | GO:0033047 | regulation of mitotic sister chromatid segregation |
| BP | GO:0051653 | spindle localization |
| BP | GO:0007131 | reciprocal meiotic recombination |
| BP | GO:0140527 | reciprocal homologous recombination |
| BP | GO:0035825 | homologous recombination |
| BP | GO:0017156 | calcium-ion regulated exocytosis |
| BP | GO:0044773 | mitotic DNA damage checkpoint signaling |
| BP | GO:0045921 | positive regulation of exocytosis |
| BP | GO:0007094 | mitotic spindle assembly checkpoint signaling |
| BP | GO:0071173 | spindle assembly checkpoint signaling |
| BP | GO:0071174 | mitotic spindle checkpoint signaling |
| BP | GO:0031577 | spindle checkpoint signaling |
| BP | GO:0030261 | chromosome condensation |
| BP | GO:2000242 | negative regulation of reproductive process |
| BP | GO:0031638 | zymogen activation |
| BP | GO:0090307 | mitotic spindle assembly |
| BP | GO:0000281 | mitotic cytokinesis |
| BP | GO:0048665 | neuron fate specification |
| BP | GO:0006270 | DNA replication initiation |
| BP | GO:0046688 | response to copper ion |
| BP | GO:0051293 | establishment of spindle localization |
| BP | GO:0007129 | homologous chromosome pairing at meiosis |
| BP | GO:0042743 | hydrogen peroxide metabolic process |
| BP | GO:0046686 | response to cadmium ion |
| BP | GO:0001756 | somitogenesis |
| BP | GO:0051310 | metaphase plate congression |
| BP | GO:0071276 | cellular response to cadmium ion |
| BP | GO:0044786 | cell cycle DNA replication |
| BP | GO:0021517 | ventral spinal cord development |
| BP | GO:0006953 | acute-phase response |
| BP | GO:0044818 | mitotic G2/M transition checkpoint |
| BP | GO:0010043 | response to zinc ion |
| BP | GO:0071280 | cellular response to copper ion |
| BP | GO:0034508 | centromere complex assembly |
| BP | GO:0007143 | female meiotic nuclear division |
| BP | GO:0008608 | attachment of spindle microtubules to kinetochore |
| BP | GO:0006882 | cellular zinc ion homeostasis |
| BP | GO:0055069 | zinc ion homeostasis |
| BP | GO:0010273 | detoxification of copper ion |
| BP | GO:1990169 | stress response to copper ion |
| BP | GO:0061687 | detoxification of inorganic compound |
| BP | GO:0097501 | stress response to metal ion |
| BP | GO:0051383 | kinetochore organization |
| BP | GO:0071294 | cellular response to zinc ion |
| BP | GO:0009312 | oligosaccharide biosynthetic process |
| BP | GO:0042744 | hydrogen peroxide catabolic process |
| BP | GO:0007095 | mitotic G2 DNA damage checkpoint signaling |
| BP | GO:0040001 | establishment of mitotic spindle localization |
| BP | GO:0017158 | regulation of calcium ion-dependent exocytosis |
| BP | GO:0021983 | pituitary gland development |
| BP | GO:0051307 | meiotic chromosome separation |
| BP | GO:0000132 | establishment of mitotic spindle orientation |
| BP | GO:0021522 | spinal cord motor neuron differentiation |
| BP | GO:0008228 | opsonization |
| BP | GO:0003228 | atrial cardiac muscle tissue development |
| BP | GO:0006268 | DNA unwinding involved in DNA replication |
| BP | GO:0006833 | water transport |
| BP | GO:0051923 | sulfation |
| BP | GO:0071459 | protein localization to chromosome, centromeric region |
| BP | GO:0001867 | complement activation, lectin pathway |
| BP | GO:0031282 | regulation of guanylate cyclase activity |
| BP | GO:0045956 | positive regulation of calcium ion-dependent exocytosis |
| BP | GO:0051382 | kinetochore assembly |
| BP | GO:0034501 | protein localization to kinetochore |
| BP | GO:1903083 | protein localization to condensed chromosome |
| BP | GO:0140059 | dendrite arborization |
| BP | GO:1903027 | regulation of opsonization |
| BP | GO:0010454 | negative regulation of cell fate commitment |
| BP | GO:0000727 | double-strand break repair via break-induced replication |
| BP | GO:0007501 | mesodermal cell fate specification |
| BP | GO:0001833 | inner cell mass cell proliferation |

Abbreviations: BP, Biological Processes.

Additional file Table.S2. Significant gene ontology terms for CENPQ-expressed differential genes (Cellular Component).

| Ontology | ID | Description |
| --- | --- | --- |
| CC | GO:0000793 | condensed chromosome |
| CC | GO:0000775 | chromosome, centromeric region |
| CC | GO:0072562 | blood microparticle |
| CC | GO:0098687 | chromosomal region |
| CC | GO:0000776 | kinetochore |
| CC | GO:0000940 | outer kinetochore |
| CC | GO:0000779 | condensed chromosome, centromeric region |
| CC | GO:0005871 | kinesin complex |
| CC | GO:0031838 | haptoglobin-hemoglobin complex |
| CC | GO:0034364 | high-density lipoprotein particle |
| CC | GO:0062023 | collagen-containing extracellular matrix |
| CC | GO:0005833 | hemoglobin complex |
| CC | GO:0032590 | dendrite membrane |
| CC | GO:0005581 | collagen trimer |
| CC | GO:0016324 | apical plasma membrane |
| CC | GO:0005819 | spindle |
| CC | GO:0045177 | apical part of cell |
| CC | GO:1902711 | GABA-A receptor complex |
| CC | GO:0097060 | synaptic membrane |
| CC | GO:0098793 | presynapse |
| CC | GO:1902710 | GABA receptor complex |
| CC | GO:0071162 | CMG complex |
| CC | GO:0034358 | plasma lipoprotein particle |
| CC | GO:0051233 | spindle midzone |
| CC | GO:1990777 | lipoprotein particle |
| CC | GO:0071682 | endocytic vesicle lumen |
| CC | GO:0031261 | DNA replication preinitiation complex |
| CC | GO:0034707 | chloride channel complex |
| CC | GO:0031225 | anchored component of membrane |
| CC | GO:0099060 | integral component of postsynaptic specialization membrane |
| CC | GO:0072686 | mitotic spindle |
| CC | GO:0032994 | protein-lipid complex |
| CC | GO:0000800 | lateral element |
| CC | GO:0098948 | intrinsic component of postsynaptic specialization membrane |
| CC | GO:0000794 | condensed nuclear chromosome |
| CC | GO:0043025 | neuronal cell body |
| CC | GO:0032589 | neuron projection membrane |
| CC | GO:0043679 | axon terminus |
| CC | GO:0032809 | neuronal cell body membrane |
| CC | GO:0005657 | replication fork |
| CC | GO:0150034 | distal axon |
| CC | GO:0000228 | nuclear chromosome |
| CC | GO:0098982 | GABA-ergic synapse |
| CC | GO:0034702 | ion channel complex |
| CC | GO:0099055 | integral component of postsynaptic membrane |
| CC | GO:0044306 | neuron projection terminus |
| CC | GO:0099699 | integral component of synaptic membrane |
| CC | GO:0099240 | intrinsic component of synaptic membrane |
| CC | GO:0016342 | catenin complex |
| CC | GO:0044298 | cell body membrane |
| CC | GO:0005874 | microtubule |
| CC | GO:0042589 | zymogen granule membrane |
| CC | GO:0042734 | presynaptic membrane |
| CC | GO:0098936 | intrinsic component of postsynaptic membrane |
| CC | GO:0009925 | basal plasma membrane |
| CC | GO:0099634 | postsynaptic specialization membrane |
| CC | GO:0000922 | spindle pole |

Additional file Table.S3. Significant gene ontology terms for CENPQ-expressed differential genes (Molecular Function).

| Ontology | ID | Description |
| --- | --- | --- |
| MF | GO:0005179 | hormone activity |
| MF | GO:0030546 | signaling receptor activator activity |
| MF | GO:0048018 | receptor ligand activity |
| MF | GO:0017171 | serine hydrolase activity |
| MF | GO:0015267 | channel activity |
| MF | GO:0022803 | passive transmembrane transporter activity |
| MF | GO:0004252 | serine-type endopeptidase activity |
| MF | GO:0008236 | serine-type peptidase activity |
| MF | GO:0022836 | gated channel activity |
| MF | GO:0003777 | microtubule motor activity |
| MF | GO:0005216 | ion channel activity |
| MF | GO:0003774 | cytoskeletal motor activity |
| MF | GO:0015276 | ligand-gated ion channel activity |
| MF | GO:0022834 | ligand-gated channel activity |
| MF | GO:0005254 | chloride channel activity |
| MF | GO:0015108 | chloride transmembrane transporter activity |
| MF | GO:0005230 | extracellular ligand-gated ion channel activity |
| MF | GO:0008146 | sulfotransferase activity |
| MF | GO:0019825 | oxygen binding |
| MF | GO:0022824 | transmitter-gated ion channel activity |
| MF | GO:0022835 | transmitter-gated channel activity |
| MF | GO:0008574 | plus-end-directed microtubule motor activity |
| MF | GO:0005253 | anion channel activity |
| MF | GO:0099095 | ligand-gated anion channel activity |
| MF | GO:0071855 | neuropeptide receptor binding |
| MF | GO:0004890 | GABA-A receptor activity |
| MF | GO:1904315 | transmitter-gated ion channel activity involved in regulation of postsynaptic membrane potential |
| MF | GO:0031720 | haptoglobin binding |
| MF | GO:0030594 | neurotransmitter receptor activity |
| MF | GO:0020037 | heme binding |
| MF | GO:0015103 | inorganic anion transmembrane transporter activity |
| MF | GO:0099529 | neurotransmitter receptor activity involved in regulation of postsynaptic membrane potential |
| MF | GO:0008083 | growth factor activity |
| MF | GO:0016917 | GABA receptor activity |
| MF | GO:0005201 | extracellular matrix structural constituent |
| MF | GO:0015079 | potassium ion transmembrane transporter activity |
| MF | GO:0005249 | voltage-gated potassium channel activity |
| MF | GO:0030547 | signaling receptor inhibitor activity |
| MF | GO:0046906 | tetrapyrrole binding |
| MF | GO:0005267 | potassium channel activity |
| MF | GO:0016782 | transferase activity, transferring sulphur-containing groups |
| MF | GO:0001216 | DNA-binding transcription activator activity |
| MF | GO:0008509 | anion transmembrane transporter activity |
| MF | GO:0022851 | GABA-gated chloride ion channel activity |
| MF | GO:0048019 | receptor antagonist activity |
| MF | GO:0001228 | DNA-binding transcription activator activity, RNA polymerase II-specific |
| MF | GO:0098960 | postsynaptic neurotransmitter receptor activity |
| MF | GO:0005344 | oxygen carrier activity |
| MF | GO:0008017 | microtubule binding |
| MF | GO:0005506 | iron ion binding |
| MF | GO:0005237 | inhibitory extracellular ligand-gated ion channel activity |
| MF | GO:0034483 | heparan sulfate sulfotransferase activity |
| MF | GO:0016709 | oxidoreductase activity, acting on paired donors, with incorporation or reduction of molecular oxygen, NAD(P)H as one donor, and incorporation of one atom of oxygen |
| MF | GO:0001664 | G protein-coupled receptor binding |
| MF | GO:0004175 | endopeptidase activity |
| MF | GO:0005231 | excitatory extracellular ligand-gated ion channel activity |
| MF | GO:0005261 | cation channel activity |
| MF | GO:0038024 | cargo receptor activity |
| MF | GO:0003688 | DNA replication origin binding |
| MF | GO:0005544 | calcium-dependent phospholipid binding |
| MF | GO:0008395 | steroid hydroxylase activity |
| MF | GO:0005005 | transmembrane-ephrin receptor activity |
| MF | GO:0008503 | benzodiazepine receptor activity |
| MF | GO:0005044 | scavenger receptor activity |
| MF | GO:0015081 | sodium ion transmembrane transporter activity |
| MF | GO:0015631 | tubulin binding |

Abbreviations: CC, Cellular Component.

Additional file Table.S4. Significant gene ontology terms for CENPQ-expressed differential genes (KEGG pathway).

| Ontology | ID | Description |
| --- | --- | --- |
| KEGG | hsa04110 | Cell cycle |
| KEGG | hsa00980 | Metabolism of xenobiotics by cytochrome P450 |
| KEGG | hsa04978 | Mineral absorption |
| KEGG | hsa00830 | Retinol metabolism |
| KEGG | hsa05033 | Nicotine addiction |
| KEGG | hsa00982 | Drug metabolism - cytochrome P450 |
| KEGG | hsa04610 | Complement and coagulation cascades |
| KEGG | hsa04974 | Protein digestion and absorption |
| KEGG | hsa05204 | Chemical carcinogenesis - DNA adducts |
| KEGG | hsa00140 | Steroid hormone biosynthesis |
| KEGG | hsa03460 | Fanconi anemia pathway |
| KEGG | hsa04976 | Bile secretion |
| KEGG | hsa00601 | Glycosphingolipid biosynthesis - lacto and neolacto series |
| KEGG | hsa04114 | Oocyte meiosis |
| KEGG | hsa04512 | ECM-receptor interaction |

Abbreviations: KEGG, Kyoto Gene and Genome Encyclopedia.

Additional file Table.S5. Significant GSEA pathway for differentially expressed genes of CENPQ

| Description | Enrichment Score | NES | p.adjust |
| --- | --- | --- | --- |
| wp complement system | -0.730 | -3.795 | 4.54E-08 |
| reactome complement cascade | -0.769 | -3.472 | 5.02E-07 |
| kegg complement and coagulation cascades | -0.771 | -3.300 | 1.81E-06 |
| wp selenium micronutrient network | -0.784 | -3.253 | 2.48E-06 |
| reactome innate immune system | -0.360 | -2.931 | 2.00E-05 |
| wp network map of sarscov2 signaling pathway | -0.488 | -2.859 | 1.14E-04 |
| reactome biological oxidations | -0.421 | -2.688 | 1.14E-04 |
| wp folate metabolism | -0.687 | -2.851 | 1.56E-04 |
| reactome phase i functionalization of compounds | -0.558 | -2.773 | 1.56E-04 |
| wp metapathway biotransformation phase i and ii | -0.390 | -2.489 | 4.23E-04 |
| wp complement system in neuronal development and plasticity | -0.570 | -2.574 | 9.29E-04 |
| reactome cytochrome p450 arranged by substrate type | -0.563 | -2.467 | 2.36E-03 |
| wp oxidation by cytochrome p450 | -0.599 | -2.488 | 3.85E-03 |
| kegg metabolism of xenobiotics by cytochrome p450 | -0.537 | -2.298 | 8.21E-03 |
| reactome response to elevated platelet cytosolic ca2 | -0.530 | -2.268 | 9.51E-03 |
| reactome metabolism of lipids | -0.299 | -2.099 | 1.18E-02 |
| reactome neutrophil degranulation | -0.455 | -2.055 | 1.95E-02 |
| naba ecm regulators | 0.450 | 2.030 | 2.02E-02 |
| wp nuclear receptors metapathway | -0.341 | -1.999 | 2.38E-02 |
| reactome platelet activation signaling and aggregation | -0.419 | -2.038 | 2.82E-02 |
| wp malignant pleural mesothelioma | 0.378 | 2.023 | 3.24E-02 |
| naba ecm affiliated | -0.288 | -1.829 | 4.70E-02 |
| reactome cellular responses to stimuli | -0.278 | -1.776 | 4.89E-02 |
| kegg drug metabolism cytochrome p450 | -0.451 | -1.932 | 5.58E-02 |
| wp hippomerlin signaling dysregulation | 0.537 | 1.917 | 5.58E-02 |
| wp mecp2 and associated rett syndrome | 0.559 | 1.874 | 6.02E-02 |
| kegg retinol metabolism | -0.426 | -1.869 | 6.02E-02 |
| reactome metabolism of steroids | -0.473 | -1.963 | 7.76E-02 |
| reactome degradation of the extracellular matrix | 0.477 | 1.898 | 7.76E-02 |
| reactome cell cell junction organization | 0.487 | 1.791 | 8.24E-02 |
| reactome cell cycle | 0.267 | 1.700 | 9.40E-02 |
| reactome transport of small molecules | -0.200 | -1.702 | 1.06E-01 |
| kegg axon guidance | 0.484 | 1.731 | 1.34E-01 |
| reactome cell junction organization | 0.460 | 1.790 | 1.48E-01 |
| reactome class b 2 secretin family receptors | -0.428 | -1.670 | 1.59E-01 |
| reactome cell cycle mitotic | 0.264 | 1.606 | 1.59E-01 |
| reactome cytokine signaling in immune system | -0.251 | -1.470 | 1.97E-01 |
| reactome signaling by nuclear receptors | -0.355 | -1.628 | 2.00E-01 |
| reactome neuronal system | 0.283 | 1.564 | 2.00E-01 |

Abbreviations: GSEA, Gene Set Enrichment Analysis.
